# Supplementary material
Source: PubMed Central journal article supplement (PMC3231823)

1 **Supplemental Figure 1. Rat GH promotes formation of GHR-JAK2-IGF-1R protein complex in  $\beta$ -**  
2 **cells.**

3 Serum-starved INS-1 cells were stimulated with vehicle (-) or rat GH (500 ng/ml) for 15 min. Cell  
4 extracts were immunoprecipitated with anti-IGF-1R antibody (lanes 1-6). The immunoprecipitates were  
5 then analyzed by immunoblotting with anti-JAK2 (lanes 1 and 2), anti-GHR (lanes 3 and 4), and anti-  
6 IGF-1R (lanes 5 and 6), respectively.

Ma et al., Supplemental Figure 1

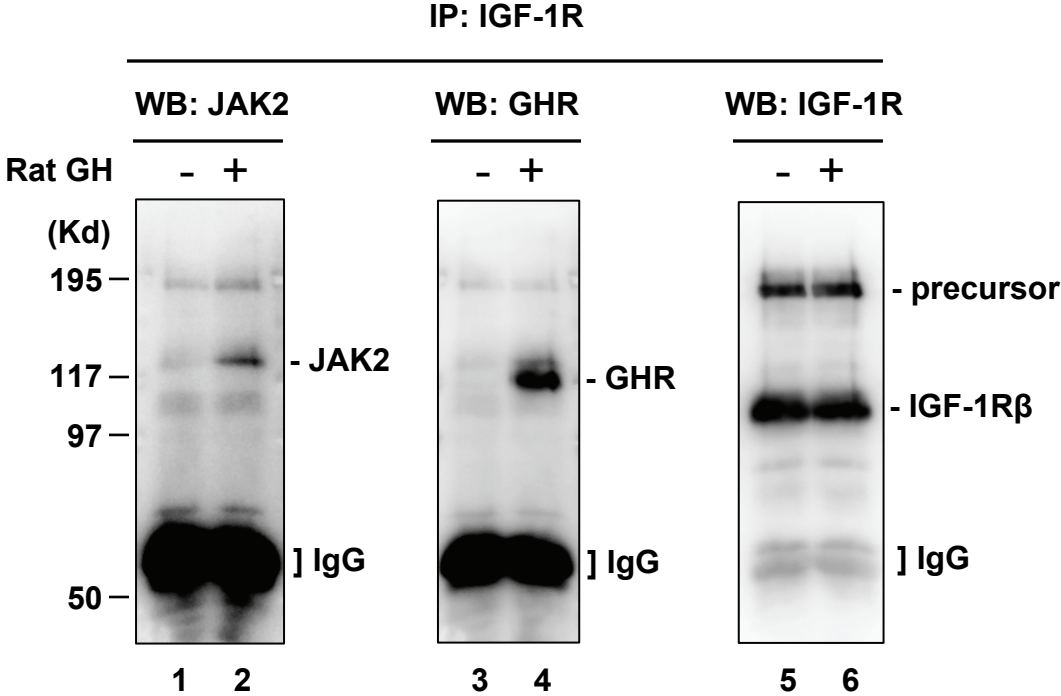

Supplement: supp_me.2011-1052_me-11-1052_Suppl_Fig1_legends.pdf [file supp_me.2011-1052_me-11-1052_Suppl_Fig1_legends.pdf]
